# Supplementary material for: Risk of Inpatient Stay for Mental Illness Among Individuals With Substance Use Disorders
Source: Atypon-hosted journal article supplement (doi:10.1176/appi.ps.201100455), 2012-09-01
Supplement: pss6309_0938_ds.pdf [file pss6309_0938_ds.pdf]

Table 1: Risk of inpatient stay for mental illness among a representative sample of American adults (N=37,654), by differing types of substance abuse or dependence after adjusting for sociodemographic characteristics, mental health, and overall health

|                                                   | Number of adults | Weighted percent | Weighted percent with inpatient stay | Adjusted odds ratio <sup>a</sup> | 95% confidence interval |
|---------------------------------------------------|------------------|------------------|--------------------------------------|----------------------------------|-------------------------|
| All                                               | 37,654           | 100              | .9                                   | ---                              | ---                     |
| Sex/Race                                          |                  |                  |                                      |                                  |                         |
| White male                                        | 11,542           | 33               | .9                                   | ---                              | ---                     |
| White female                                      | 13,153           | 36               | .9                                   | .76                              | .47-1.24                |
| Black male                                        | 1834             | 5                | 1.8                                  | 1.78                             | .96-3.32                |
| Black female                                      | 2530             | 6                | 1.1                                  | .80                              | .38-1.66                |
| Hispanic male                                     | 2668             | 7                | .9                                   | .69                              | .31-1.58                |
| Hispanic female                                   | 2874             | 6                | .9                                   | .87                              | .31-2.44                |
| Other                                             | 3053             | 6                | 1.0                                  | 1.56                             | .83-2.92                |
| Age                                               |                  |                  |                                      |                                  |                         |
| 18-25                                             | 18,287           | 15               | 1.1                                  | ---                              | ---                     |
| 26-34                                             | 5817             | 16               | 1.0                                  | 1.06                             | .69-1.65                |
| 35-49                                             | 8202             | 29               | 1.1                                  | 1.22                             | .79-1.88                |
| 50-64                                             | 3297             | 24               | .9                                   | 1.10                             | .52-2.31                |
| 65 or older                                       | 2051             | 16               | .5                                   | 1.00                             | .36-2.82                |
| Education                                         |                  |                  |                                      |                                  |                         |
| Less than high school                             | 6715             | 16               | 2.2                                  | ---                              | ---                     |
| High school                                       | 12,211           | 31               | 1.1                                  | .74                              | .47-1.17                |
| Some college                                      | 10,856           | 26               | .8                                   | .62                              | .37-1.06                |
| College graduate                                  | 7872             | 27               | .3                                   | .44*                             | .21-.92                 |
| Marital status                                    |                  |                  |                                      |                                  |                         |
| Married                                           | 14,265           | 55               | .5                                   | ---                              | ---                     |
| Widowed                                           | 911              | 6                | 1.1                                  | 2.27                             | .91-5.70                |
| Divorced or separated                             | 3480             | 13               | 2.2                                  | 2.28*                            | 1.10-4.69               |
| Never been married                                | 18,998           | 25               | 1.3                                  | 1.60                             | .92-2.77                |
| Number of persons in the respondent's household   |                  |                  |                                      |                                  |                         |
| One                                               | 3489             | 12               | 1.4                                  | ---                              | ---                     |
| Two                                               | 10790            | 34               | .8                                   | 1.06                             | .58-1.93                |
| Three                                             | 8628             | 19               | 1.0                                  | 1.09                             | .61-1.95                |
| Four                                              | 7953             | 19               | 1.1                                  | 1.49                             | .80-2.77                |
| Five                                              | 3966             | 9                | .8                                   | .77                              | .37-1.61                |
| Six or more                                       | 2828             | 7                | .8                                   | .88                              | .19-3.99                |
| Population density of respondent's location       |                  |                  |                                      |                                  |                         |
| 1 million or more                                 | 15,680           | 52               | .8                                   | ---                              | ---                     |
| Under 1 million                                   | 18,792           | 42               | 1.0                                  | 1.08                             | .71-1.63                |
| Not in a Core-Based Statistical Area <sup>b</sup> | 3182             | 7                | 1.5                                  | 1.22                             | .62-2.39                |
| Number of relocations in the past 12 months       |                  |                  |                                      |                                  |                         |
| Zero                                              | 14,059           | 52               | .5                                   | ---                              | ---                     |
| One                                               | 8571             | 22               | .8                                   | 1.46                             | .79-2.71                |
| Two                                               | 5726             | 12               | 1.4                                  | 1.71**                           | .92-3.16                |
| Three                                             | 4369             | 8                | 2.1                                  | 2.26***                          | 1.26-4.05               |

|                                                             |        |      |      |         |            |
|-------------------------------------------------------------|--------|------|------|---------|------------|
| Four or more                                                | 4654   | 7    | 3.0  | 2.68**  | 1.58-4.52  |
| Ever arrested and booked for breaking the law               |        |      |      |         |            |
| No                                                          | 30296  | 83   | .7   | ---     | ---        |
| Yes                                                         | 7252   | 17   | 2.3  | 1.60**  | 1.18-2.19  |
| Impoverished (under the federal poverty threshold)          |        |      |      |         |            |
| No                                                          | 30,652 | 88   | .7   | ---     | ---        |
| Yes                                                         | 6261   | 12   | 2.8  | 1.64*   | 1.06-2.53  |
| Health Insurance                                            |        |      |      |         |            |
| Yes                                                         | 29,586 | 85   | .9   | 1.56*   | 1.01-2.40  |
| No                                                          | 8068   | 15   | 1.1  | ---     | ---        |
| Past-year DSM-IV Major Depressive Episode                   |        |      |      |         |            |
| No                                                          | 34,051 | 92   | .6   | ---     | ---        |
| Yes                                                         | 3307   | 8    | 5.2  | 1.62*   | 1.02-2.58  |
| Past-year anxiety <sup>c</sup>                              |        |      |      |         |            |
| No                                                          | 35,301 | 95   | .7   | ---     | ---        |
| Yes                                                         | 1828   | 5    | 5.8  | 2.35**  | 1.41-3.90  |
| High Level of Psychological Distress on the K6 <sup>d</sup> |        |      |      |         |            |
| No                                                          | 32,035 | 89   | .4   | ---     | ---        |
| Yes                                                         | 5619   | 11   | 5.1  | 4.15*** | 2.26-7.62  |
| Self-Reported Health                                        |        |      |      |         |            |
| Excellent                                                   | 9814   | 23   | .3   | ---     | ---        |
| Very good                                                   | 14,541 | 36   | .4   | 1.11    | .62-1.97   |
| Good                                                        | 9726   | 27   | 1.1  | 1.98*   | 1.07-3.66  |
| Fair or poor                                                | 3567   | 14   | 3.2  | 3.81*** | 2.13-6.84  |
| Type of DSM-IV abuse or dependence                          |        |      |      |         |            |
| None                                                        | 32,128 | 91   | .7   | ---     | ---        |
| Alcohol only                                                | 3713   | 6.6  | 1.6  | 1.14    | .70-1.85   |
| Marijuana only                                              | 52     | 1    | 2.4  | .83     | .28-2.46   |
| Cocaine only                                                | 107    | .2   | 7.7  | 2.65*   | 1.09-6.42  |
| Opioid analgesics only                                      | 169    | .3   | 15.2 | 6.85*** | 3.12-15.07 |
| Alcohol and marijuana only                                  | 452    | .1   | 5.6  | 3.10**  | 1.62-5.90  |
| Alcohol and cocaine only                                    | 133    | .5   | 11.0 | 2.58*   | 1.10-6.04  |
| Alcohol and opioid analgesics only                          | 93     | .3   | 5.1  | .92     | .18-4.80   |
| Alcohol, marijuana, and cocaine only                        | 54     | .001 | 10.1 | 3.06    | .64-14.58  |
| Other                                                       | 278    | .4   | 9.8  | 2.36    | .58-9.58   |

<sup>a</sup>Adjusted odds ratios for hospitalization control for all of the independent variables (first column of the table).

<sup>b</sup>Core-Based Statistical areas are geographic locations defined by the federal government for use in collecting, tabulating, and publishing statistics.

<sup>c</sup>Respondents were classified as having anxiety in the past 12 months if a medical doctor or other healthcare professional had told them that they had anxiety

<sup>d</sup>Respondents were classified as having serious psychological distress in the past year if they scored higher than 13 (on a scale of 0 to 24) on the K6 (15).  
\*p<.05 \*\*p<.01 \*\*\*p<.001
